# Supplementary material
Source: PubMed Central journal article supplement (PMC10949155)
Supplement: jama-e242424-s002.pdf [file jama-e242424-s002.pdf]

## Data Sharing Statement

Pierpaoli. Neuroimaging Findings in US Government Personnel and Their Family Members Involved in Anomalous Health Incidents. *JAMA*. Published March 18, 2024.  
doi:10.1001/jama.2024.2424

### Data

**Data available:** No

### Additional Information

**Explanation for why data not available:** Data may be available in the future based on patient consent and the nature of the request.
